# Supplementary material for: Feasibility of contrast-enhanced coronary artery magnetic resonance angiography using compressed sensing
Source: Springer Nature journal article supplement (doi:10.1186/s12968-020-0601-0), 2020-01-01
Supplement: MOESM1 [file 17698752]

# Histogram distribution of the image quality scores

## CS CMRA

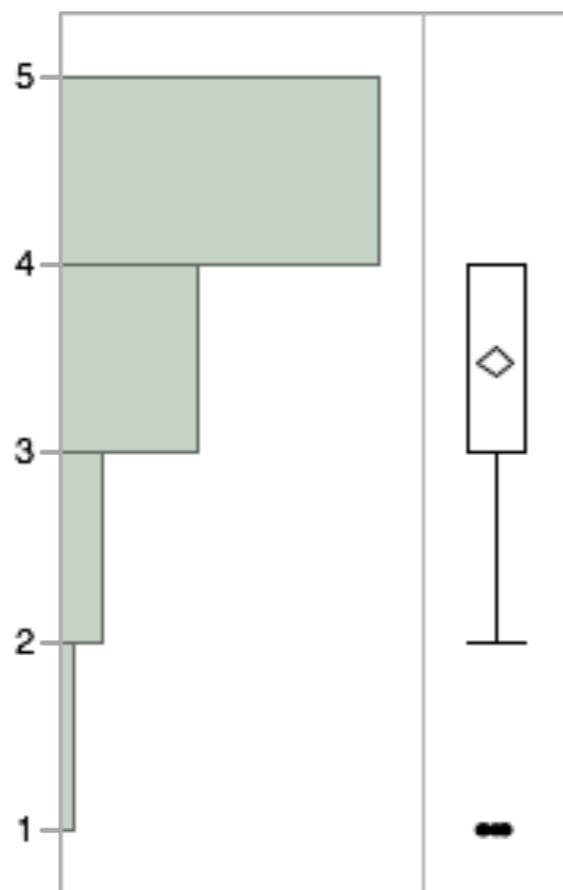

## Conventional CMRA

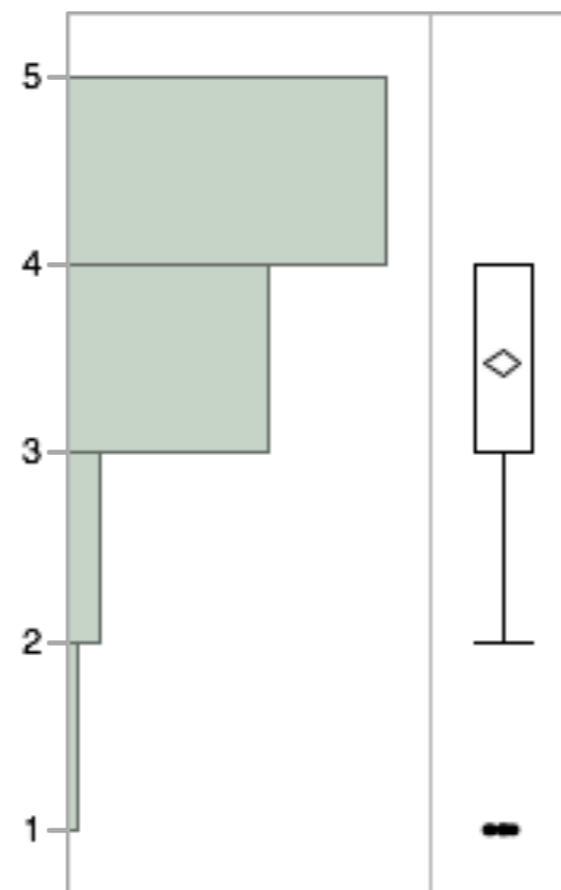

| image quality score | CS<br>(number of segment) | Conventional<br>(number of segment) |
|---------------------|---------------------------|-------------------------------------|
| 4                   | 248                       | 227                                 |
| 3                   | 107                       | 143                                 |
| 2                   | 32                        | 23                                  |
| 1                   | 11                        | 5                                   |
